# Supplementary material for: Envafolimab plus lenvatinib and transcatheter arterial chemoembolization for unresectable hepatocellular carcinoma: a prospective, single-arm, phase II study
Source: PubMed Central journal article supplement (PMC11464841; doi:10.1038/s41392-024-01991-1), 2024-10-09
Supplement: 41392_2024_1991_MOESM2_ESM.pdf [file 41392_2024_1991_MOESM2_ESM.pdf]

**a**

CD20

CD3

CD4

Merged

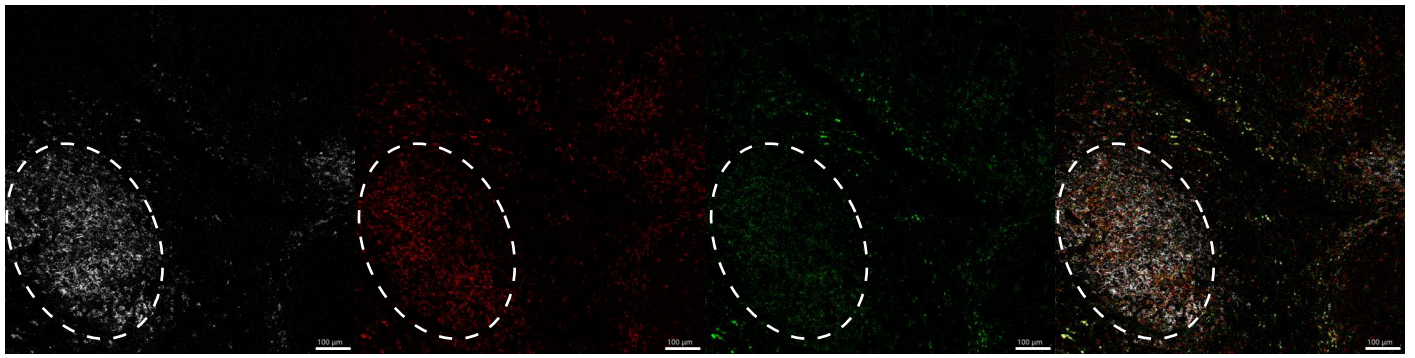**b**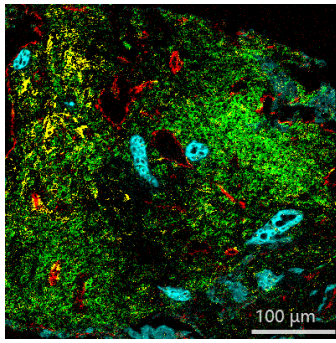

Pan-Cytokeratin CD31 αSMA CD45

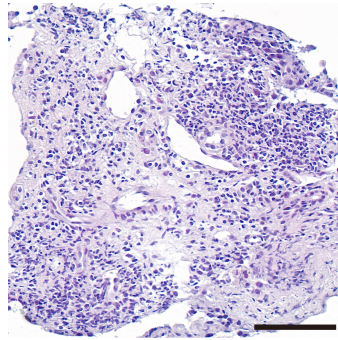

H&amp;E

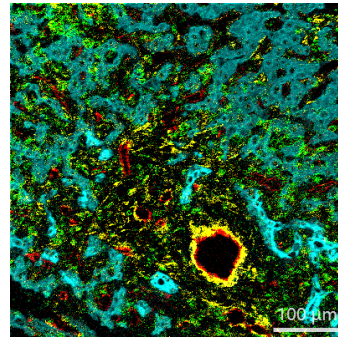

Pan-Cytokeratin CD31 αSMA CD45

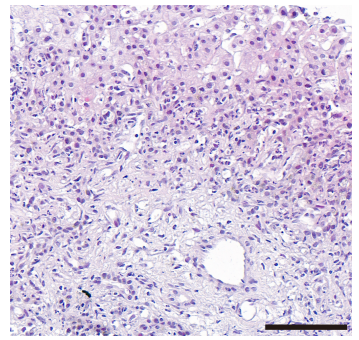

H&amp;E

Figure S1
