# Supplementary material for: Envafolimab plus lenvatinib and transcatheter arterial chemoembolization for unresectable hepatocellular carcinoma: a prospective, single-arm, phase II study
Source: PubMed Central journal article supplement (PMC11464841; doi:10.1038/s41392-024-01991-1), 2024-10-09
Supplement: 41392_2024_1991_MOESM4_ESM.pdf [file 41392_2024_1991_MOESM4_ESM.pdf]

CD68

Collagen I

Merged

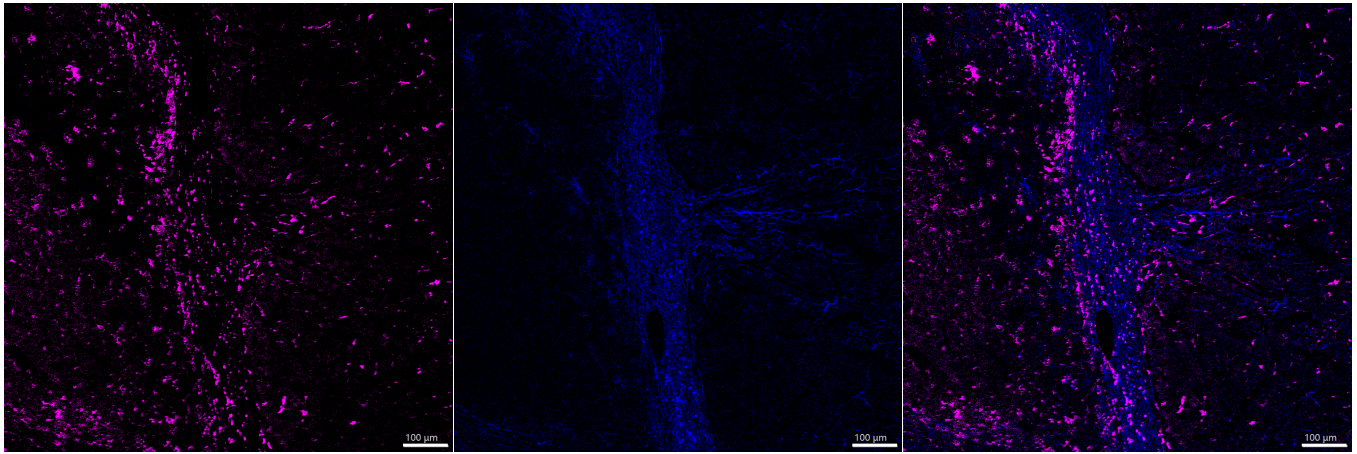

Figure S3
